# Supplementary material for: Integrative analysis of large-scale loss-of-function screens identifies robust cancer-associated genetic interactions
Source: eLife journal article supplement (doi:10.7554/elife.58925), 2020-05-28
Supplement: figures [file elife-58925-figures-v3.pdf]

---

## Figures and figure supplements

Integrative analysis of large-scale loss-of-function screens identifies robust cancer-associated genetic interactions

**Christopher J Lord *et al***

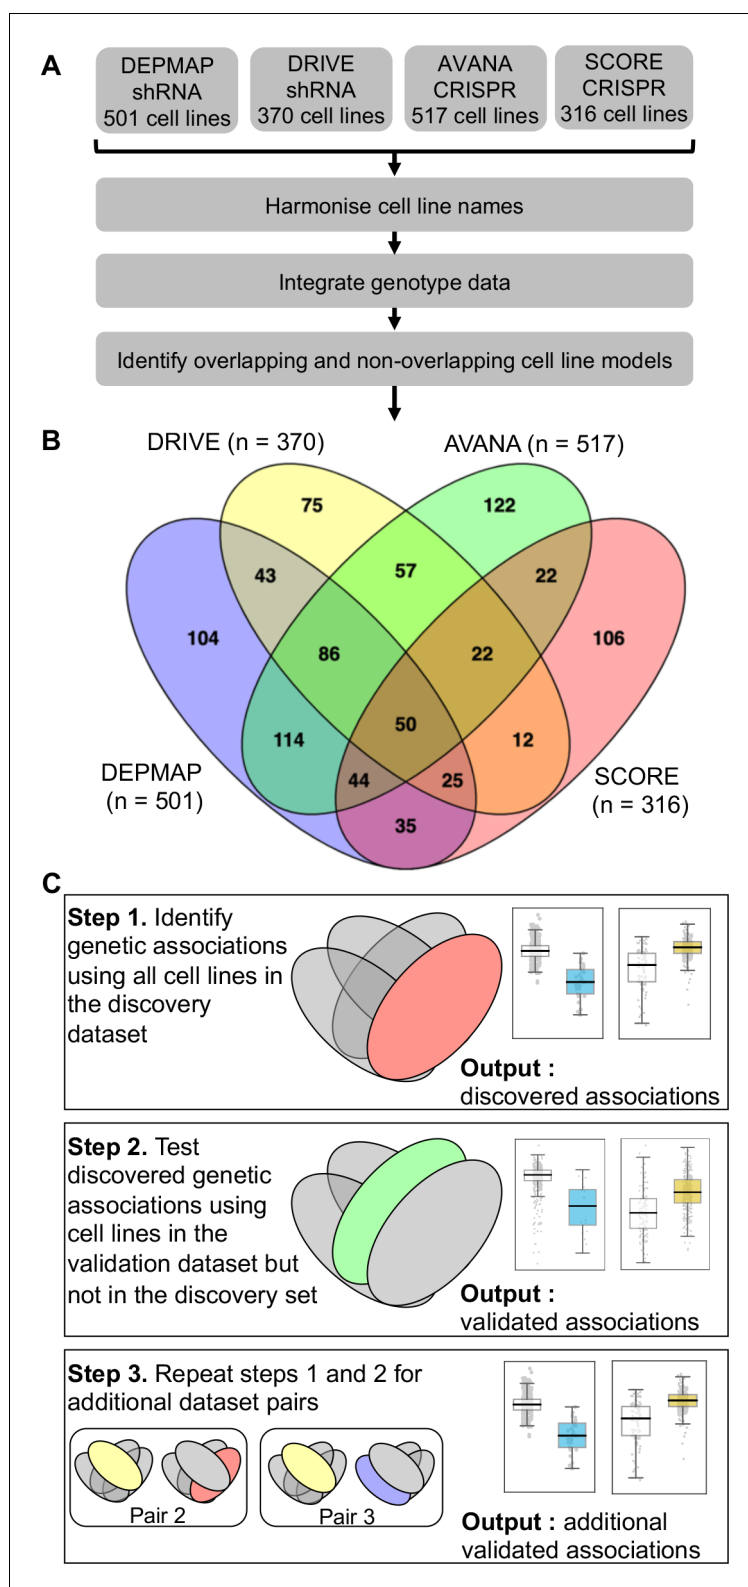

**Figure 1.** Identifying robust genetic interactions using partially overlapping loss-of-function screens. (A) Workflow showing the integration of four different loss-of-function screen datasets. (B) Venn diagram showing the overlap of cell lines between the four datasets analysed in this study. (C) Workflow showing how robust genetic interactions are identified using discovery and validation sets.

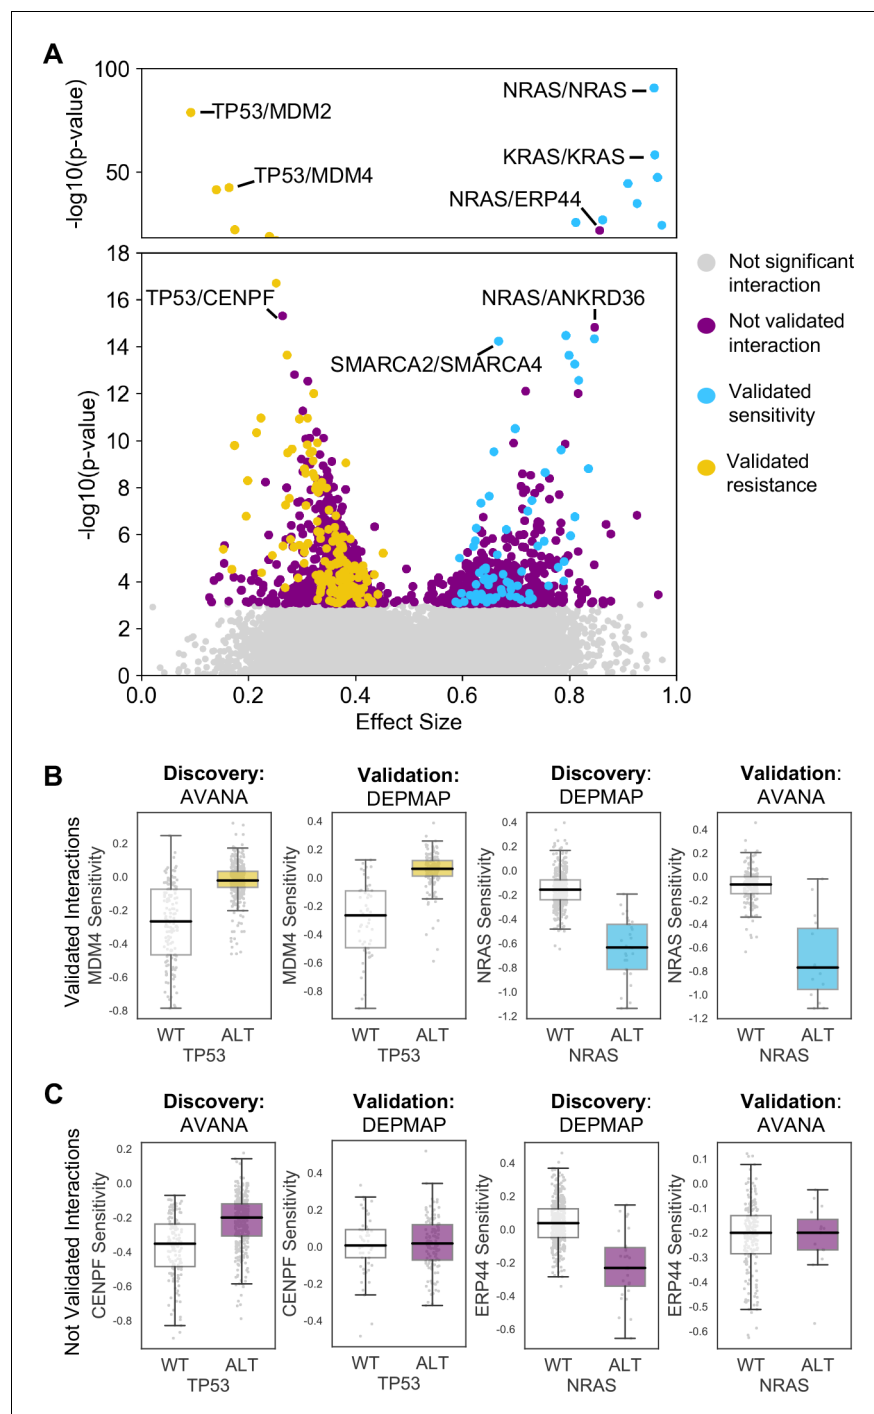

**Figure 2.** Discovered and validated genetic dependencies. (A) Scatterplot showing the genetic dependencies identified across all datasets. Each individual point represents a gene pair, the x-axis shows the common language effect size, and the y-axis shows the  $-\log_{10}$  p-value from the discovery dataset. Selected gene pairs are highlighted – the driver gene is listed first, followed by the associated dependency. Each gene pair may have been tested in multiple discovery studies, only the interaction with the most significant discovery p-value is shown. Scatterplots for individual studies are presented in **Figure 2—figure supplement 1**. (B) Tukey boxplots showing examples of robust genetic dependencies, including an increased resistance of TP53 mutant tumour cell lines to MDM4 inhibition and increased sensitivity of NRAS mutant tumour cell lines to NRAS inhibition. In each box plot the top and bottom of the box represents the third and first quartiles and the box band represents the median; whiskers extend to 1.5 times the interquartile distance from the box. WT = wild type, ALT = altered. Throughout *Figure 2 continued on next page*

*Figure 2 continued*

blue is used to indicate increased sensitivity (synthetic lethality or oncogene addiction), yellow to indicate resistance to inhibition of the target gene. (C) Boxplots showing examples of genetic dependencies discovered but not validated, including an increased resistance of *TP53* mutant cell lines to *CENPF* inhibition and increased sensitivity of *NRAS* mutant cell lines to *ERP44* inhibition.

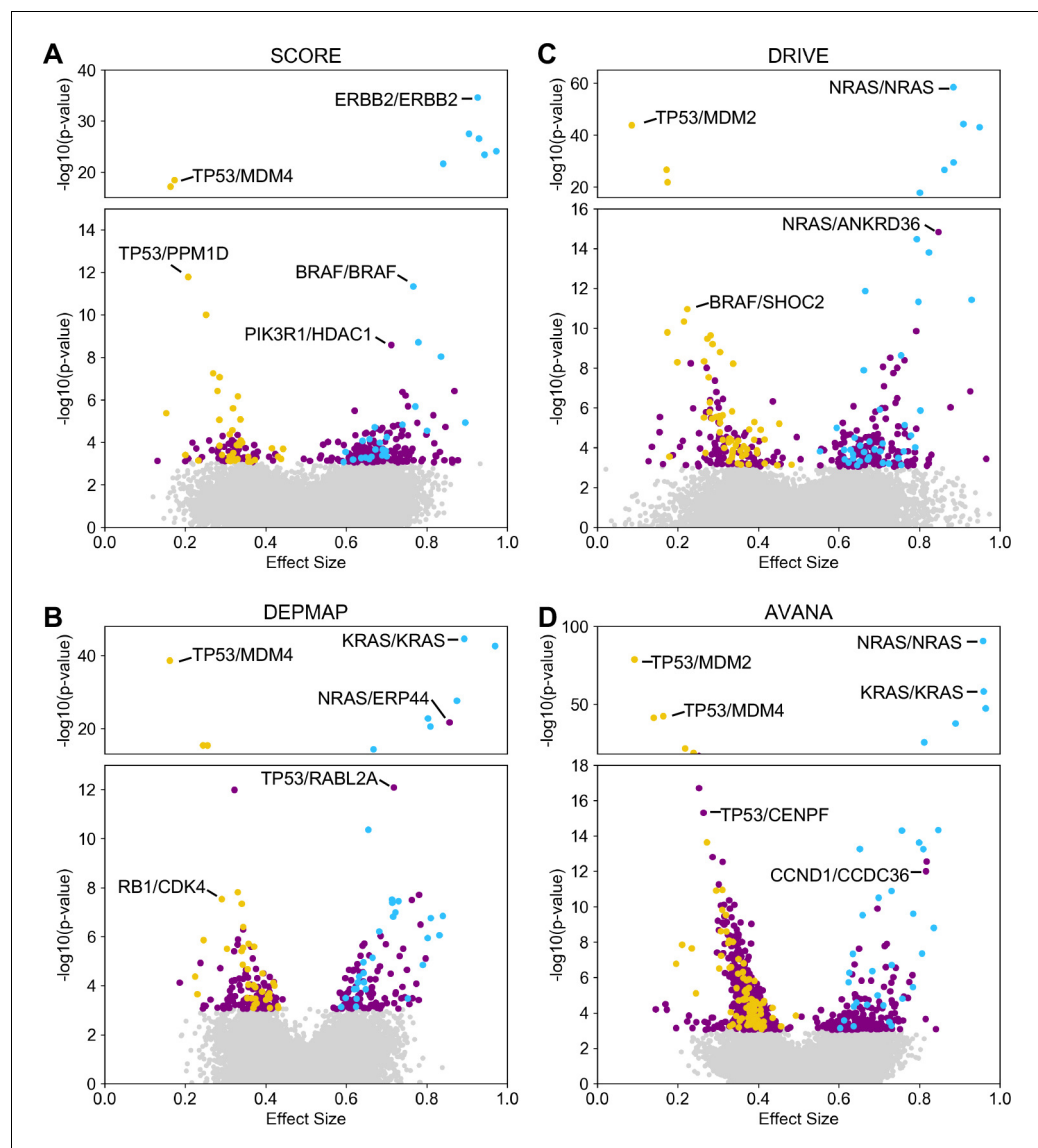

**Figure 2—figure supplement 1.** Discovered and validated genetic dependencies for individual datasets. (A) Scatterplot showing the genetic dependencies identified in the SCORE dataset. Each individual point represents a gene pair, the x-axis shows the common language effect size, and the y-axis shows the  $-\log_{10}$  p-value from the discovery dataset. (B) Scatterplot for the DEPMAP dataset. (C) Scatterplot for the DRIVE dataset. (D) Scatterplot for the AVANA dataset.

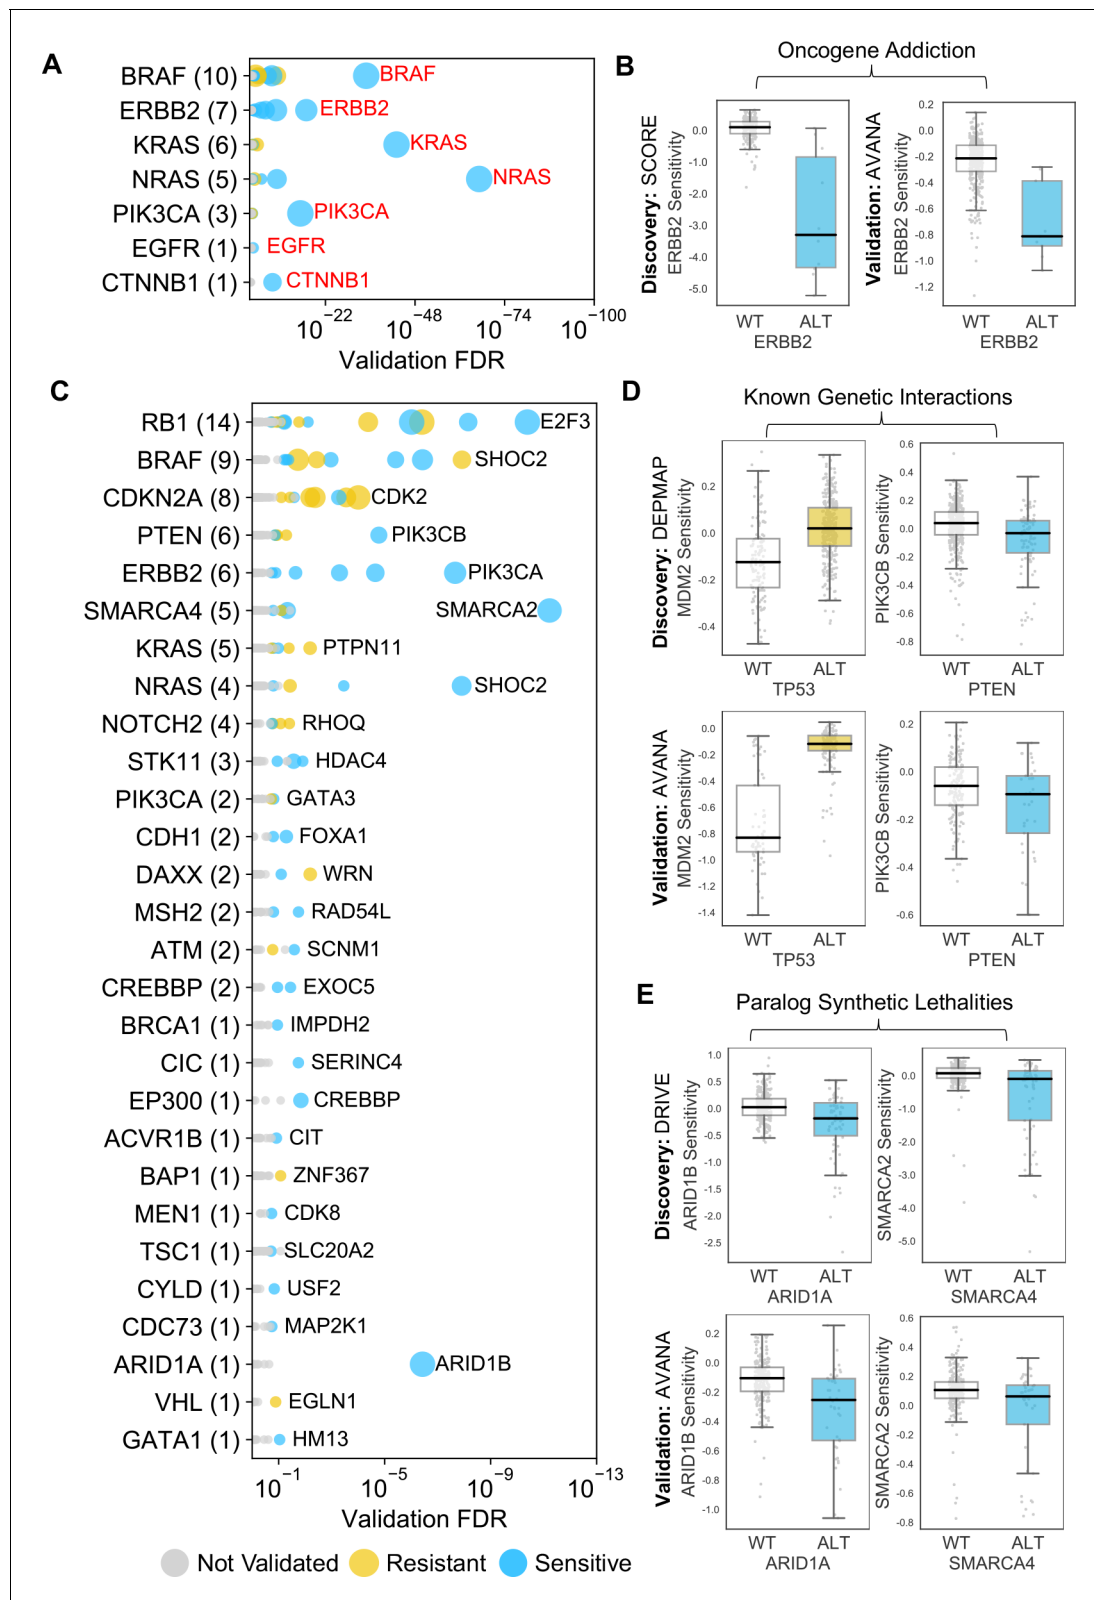

**Figure 3.** Identified robust genetic interactions. (A) Dot plot showing the robust genetic dependencies identified for oncogenes. Each coloured circle indicates a robust genetic dependency, scaled according to the number of dataset pairs it was validated in. The most significant genetic dependency (lowest FDR in a validation set) for each driver gene is labelled. Oncogenes are sorted by the number of robust dependencies and the total number of robust genetic dependencies for each driver gene is shown in parentheses. (B) Example of a validated oncogene addition – *ERBB2* amplified cells are

Figure 3 continued on next page

## Figure 3 continued

sensitive to *ERBB2* inhibition. Left shows the discovery dataset (SCORE) and right shows the validation dataset (AVANA). (C) Dot plot showing the robust genetic interactions identified for all driver genes. Each coloured circle indicates a robust genetic interaction, scaled according to the number of dataset pairs it was validated in. The most significant genetic interaction (lowest FDR in a validation set) for each driver gene is labelled. Drivers are sorted by the number of robust interactions and the total number of robust genetic interactions for each driver gene is shown in parentheses. *TP53* (132 robust genetic interactions) has been excluded for clarity, as have all self-self dependencies. (D) Examples of known genetic interactions identified from the integrated analysis, including an increased sensitivity of *PTEN* mutant tumour cell lines to *PIK3CB* inhibition and increased resistance of *TP53* mutant tumour cell lines to *MDM2* inhibition. Top row shows the data used to discover the interactions (DEPMAP dataset) while the bottom row shows the data used to validate the interactions (AVANA dataset with cell lines from DEPMAP excluded). (E) Synthetic lethal interactions involving paralog pairs. Top row shows the data used to discover the interactions (DRIVE dataset) while the bottom row shows the data used to validate the interactions (AVANA dataset with cell lines from DRIVE excluded).

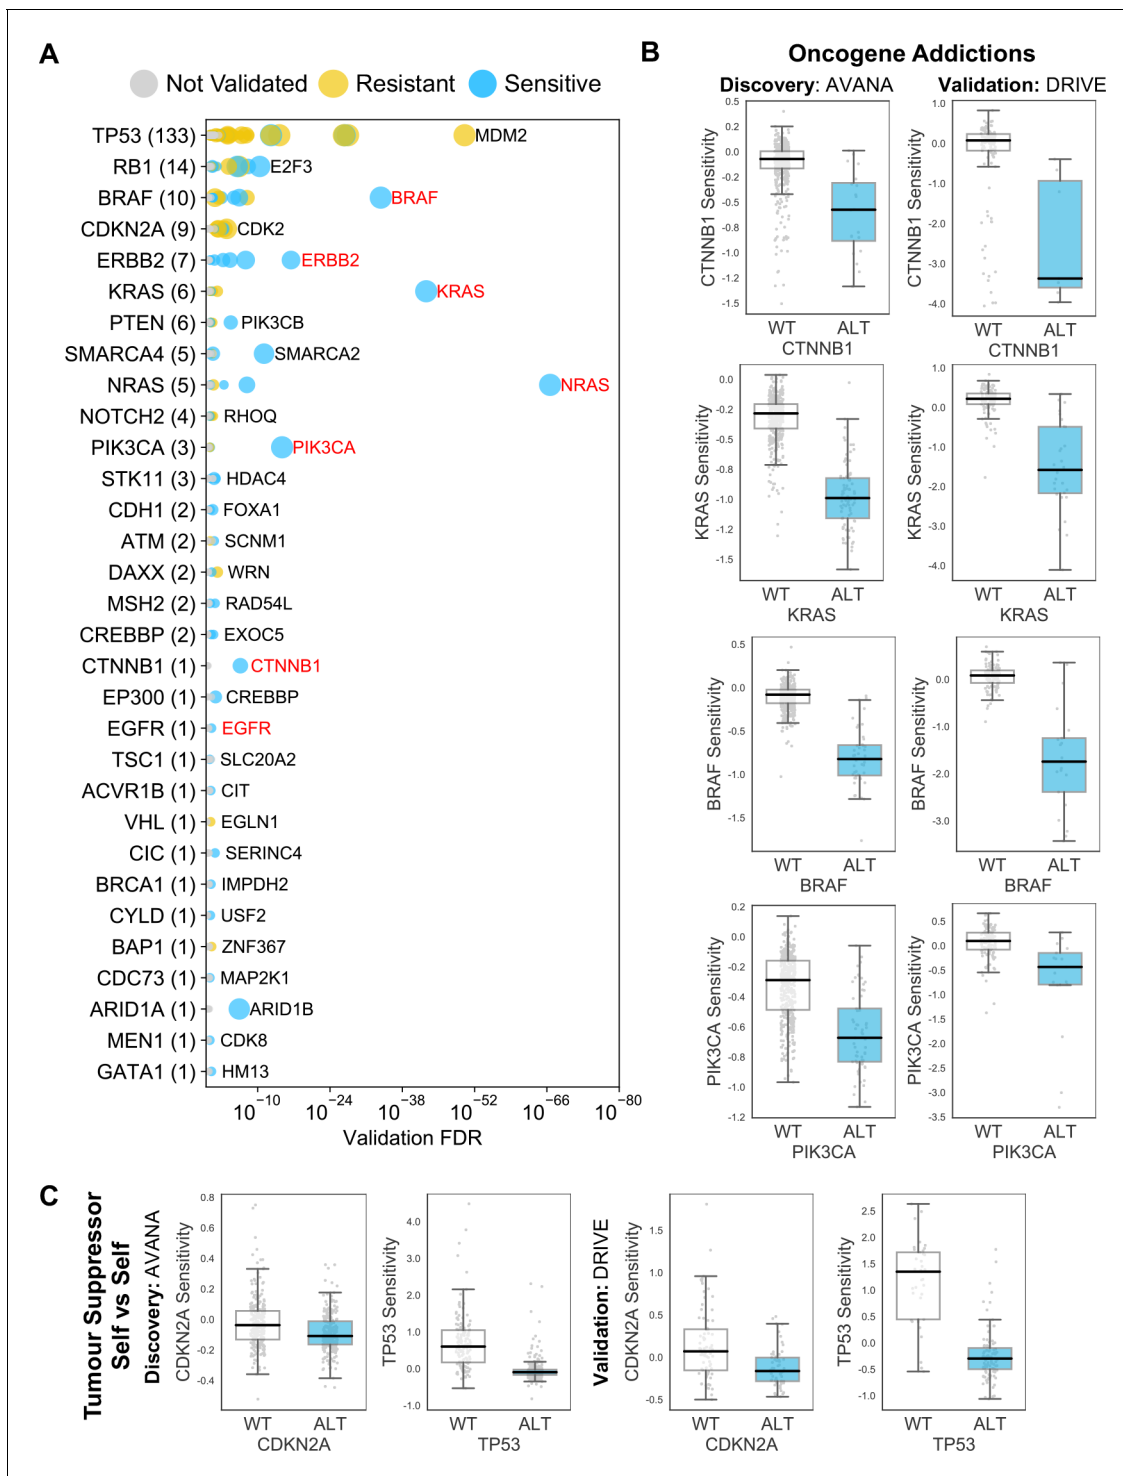

**Figure 3—figure supplement 1.** Reproducible genetic dependencies include oncogene additions. (A) Dot plot showing the reproducible genetic dependencies identified. Each coloured circle indicates a reproducible genetic dependency, scaled according to the number of dataset pairs it was validated in. The most significant genetic dependency (lowest FDR in a validation set) for each driver gene is labelled. Instances where the most significant dependency is a 'self vs self' dependency are highlighted in red. Drivers are sorted by the number of validated dependencies and the total number of reproduced genetic dependencies for each driver gene is shown in parentheses. (B) Boxplots showing oncogene additions, where the alteration of an oncogene is associated with increased sensitivity to its inhibition. (C) Boxplots showing tumour suppressor genes whose inhibition provides a growth advantage to cells that have no genetic alteration of those genes.



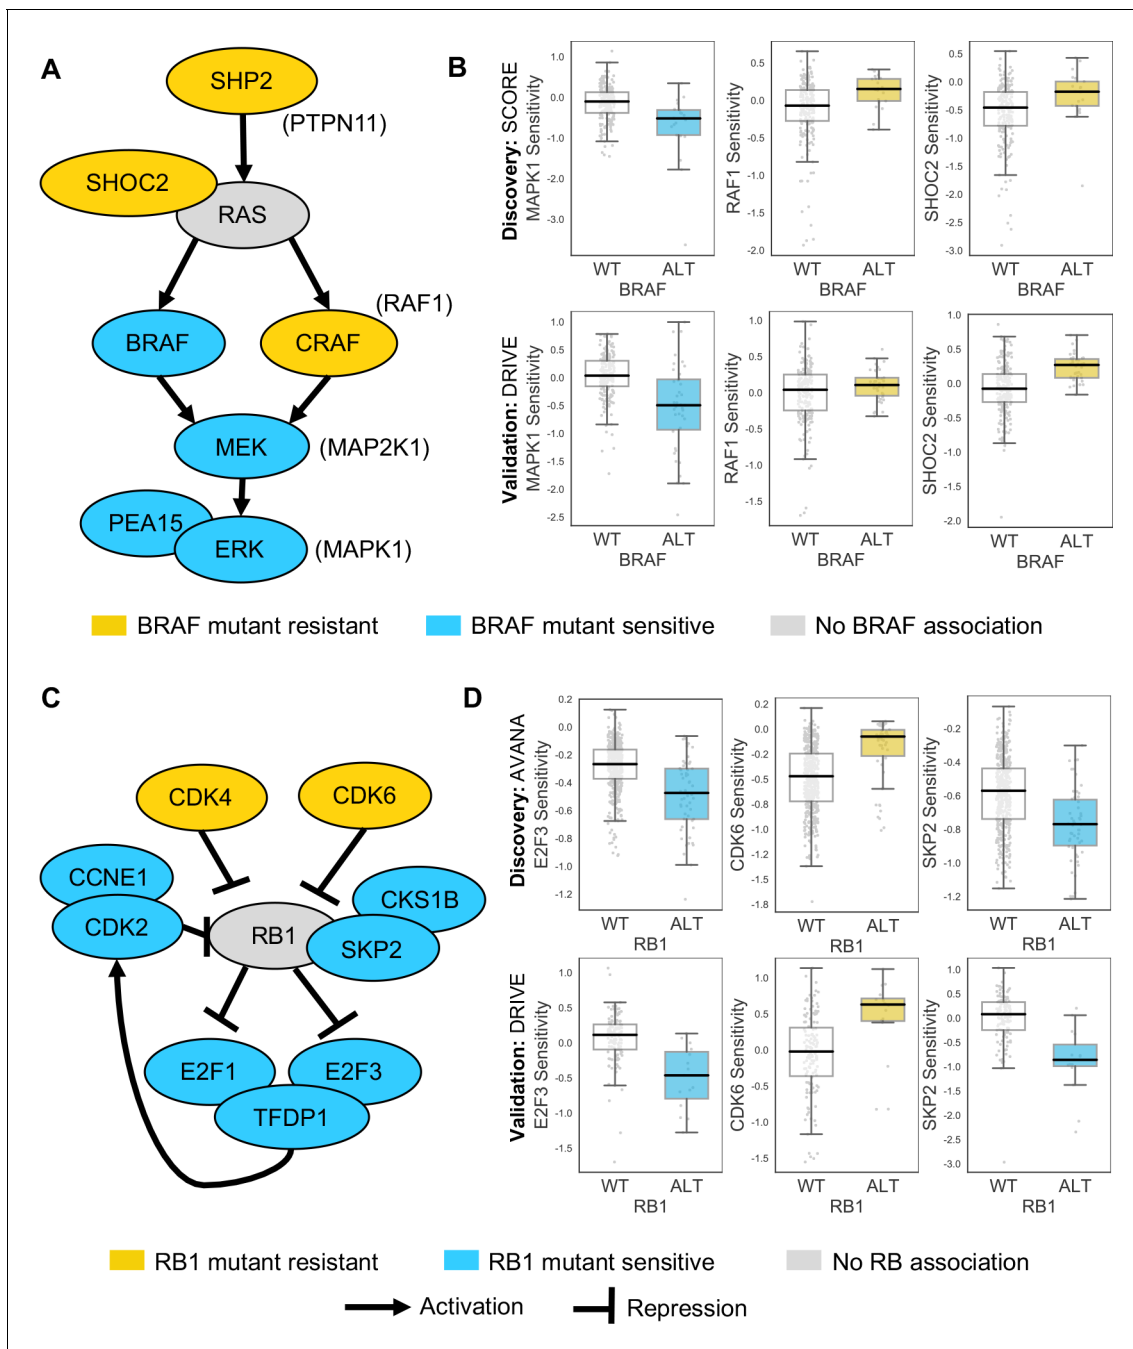

**Figure 4.** Robust genetic interactions involving *RB1* and *BRAF* recapitulate pathway relationships. (A) Simplified RAS/RAF/MEK/ERK pathway diagram. Protein names (e.g. MEK) are shown inside nodes, while associated gene names are shown adjacent (e.g. MAP2K1). Nodes are coloured according to their association with BRAF mutation - blue indicates increased sensitivity of BRAF mutant cell lines, yellow indicates increased resistance. (B) Boxplots showing selected genetic interactions associated with BRAF mutation. (C) Simplified Rb pathway diagram, highlighting robust genetic interactions involved in the Rb pathway. (D) Boxplots showing selected genetic interactions associated with RB1 alteration.

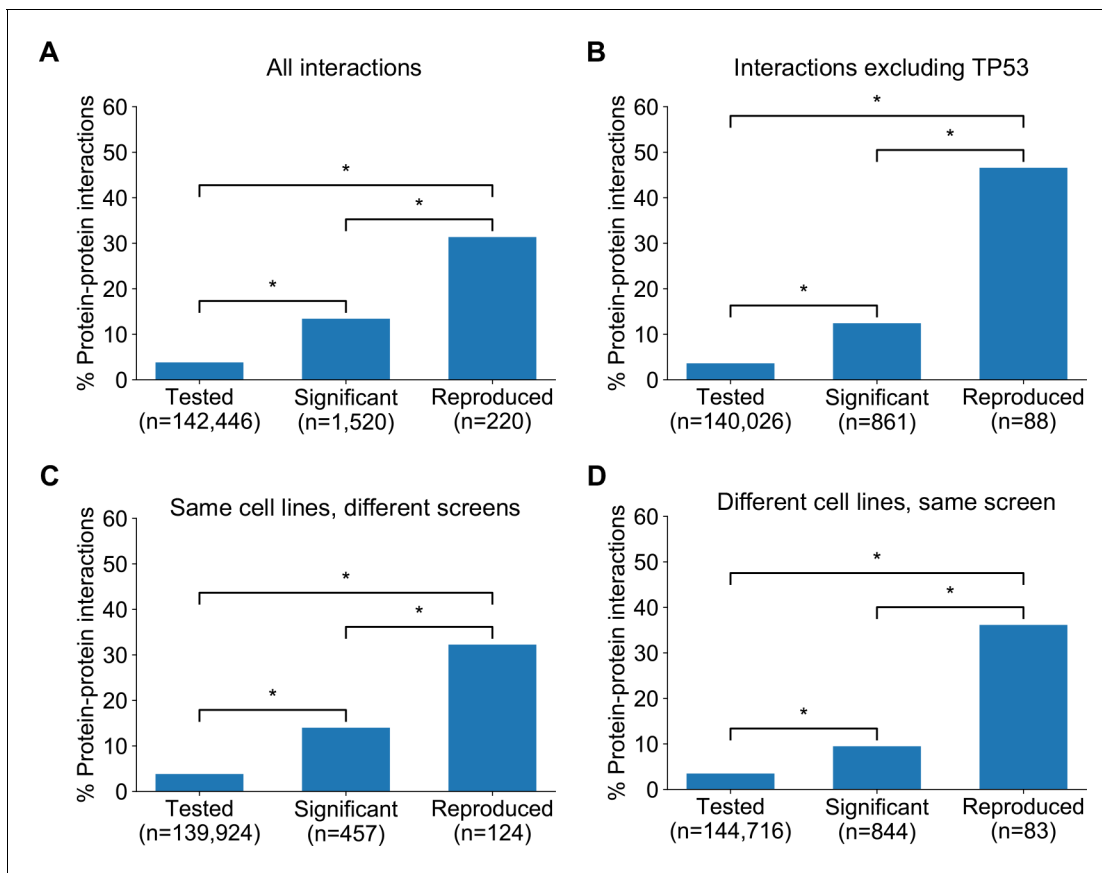

**Figure 5.** Robust genetic interactions are enriched in protein–protein interaction pairs. (A) Bar chart showing the percentage of protein–protein interacting pairs observed among different groups of gene pairs. The groups represent all gene pairs tested, gene pairs found to be significantly interacting in at least one screen (FDR < 20%), and gene pairs found to reproducibly interact across multiple screens (i.e. a discovery and validation screen). Stars (\*) indicate significant differences between groups, all significant at  $p < 0.001$  using Fisher’s Exact Test. Odds ratios and p-values are provided in **Supplementary file 5**. (B) As A but with interactions associated with *TP53* removed. (C) As B but here the discovery and validation sets contain the same cell lines screened in different studies (e.g. ‘AVANA  $\cap$  DEPMAP’ as discovery and ‘DEPMAP  $\cap$  AVANA’ as validation). Consequently, reproducibility here means ‘technical reproducibility’ using different screening platforms. (D) Similar to B but here the discovery and validation sets contain single datasets partitioned into non-overlapping cell line sets (e.g. ‘AVANA  $\setminus$  DEPMAP’ as discovery and ‘AVANA  $\cap$  DEPMAP’ as validation). Consequently, reproducibility here means ‘genetic robustness’ - the same association between gene pairs is observed across distinct genetic backgrounds.

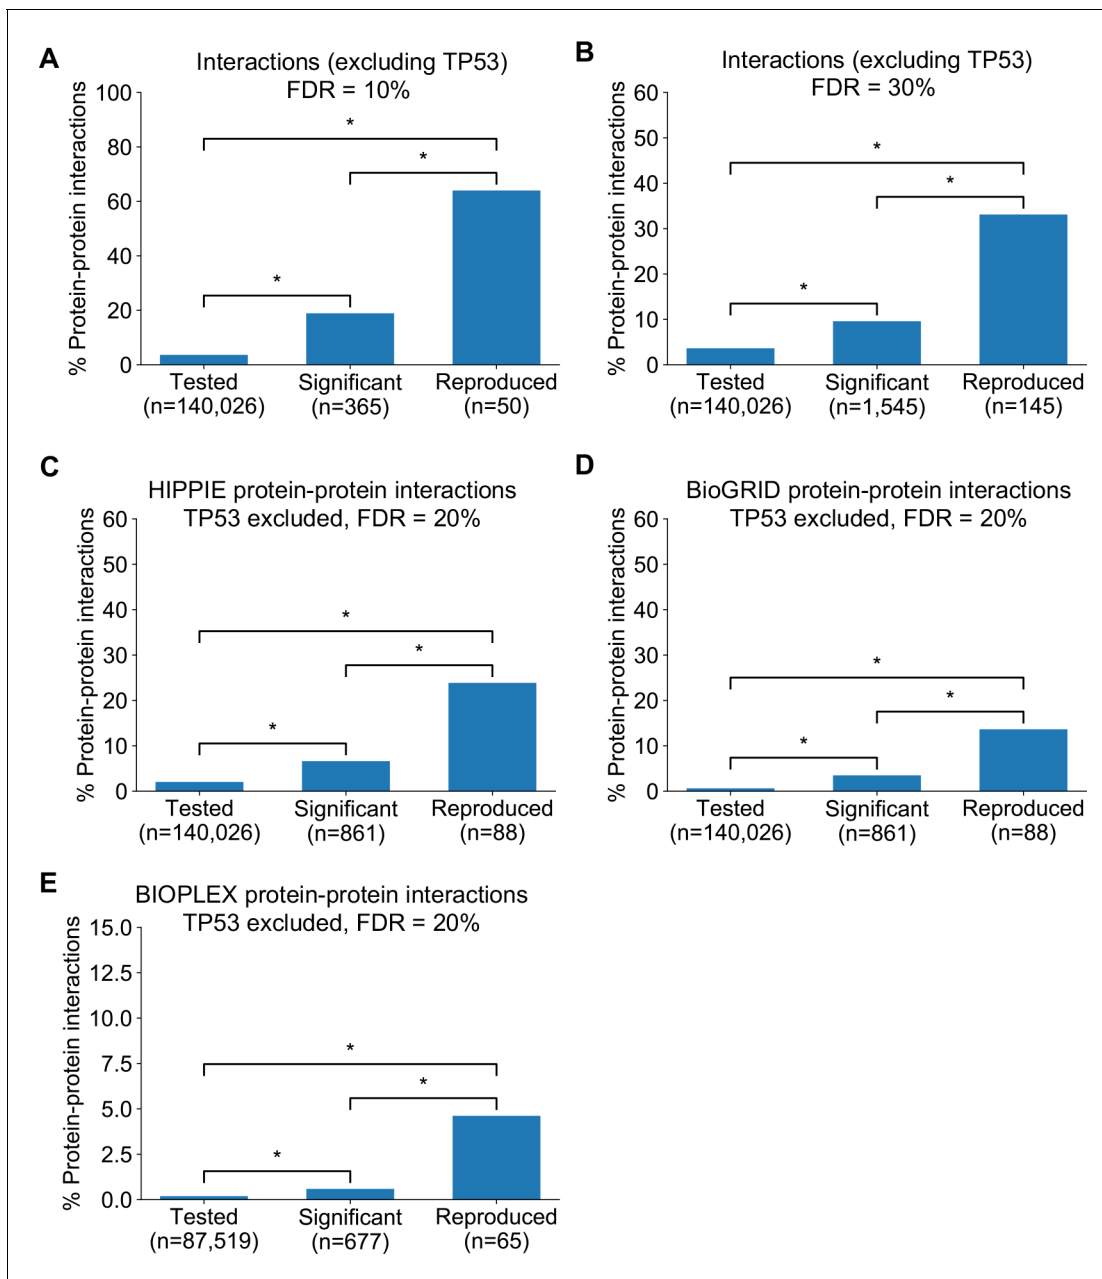

**Figure 5—figure supplement 1.** Robust genetic interactions are enriched in protein–protein interaction pairs at different thresholds and using different databases. (A) Barchart showing the percentage of protein–protein interacting pairs observed among different groups of gene pairs. The groups represent all gene pairs tested, gene pairs found to be significantly interacting in at least one screen (FDR < 10%), and gene pairs found to reproducibly interact across multiple screens (i.e. a discovery and validation screen). Stars (\*) indicate significant differences between groups, all significant at  $p < 0.001$  using Fisher's Exact Test. Due to the high percentage of protein–protein interaction pairs among the reproducible hits at this FDR, the y-axis uses a different maximum value to all other charts. (B) Same as A but with interactions identified at an FDR of 30% (C) Similar to Figure 4B but here the protein–protein interaction pairs are obtained from the HIPPIE database (D) Similar to Figure 4B but here the protein–protein interaction pairs are obtained from the BioGRID database (E) Similar to Figure 4B but here the protein–protein interaction pairs are obtained from the systematically generated BioPlex 3.0 network (Huttlin et al., 2020). Only interactions from the HEK293T cell line are included and the genetic interactions analysed are restricted to those gene pairs that could conceivably be observed in the BioPlex dataset (i.e. between baits screened and preys detected in HEK293T).

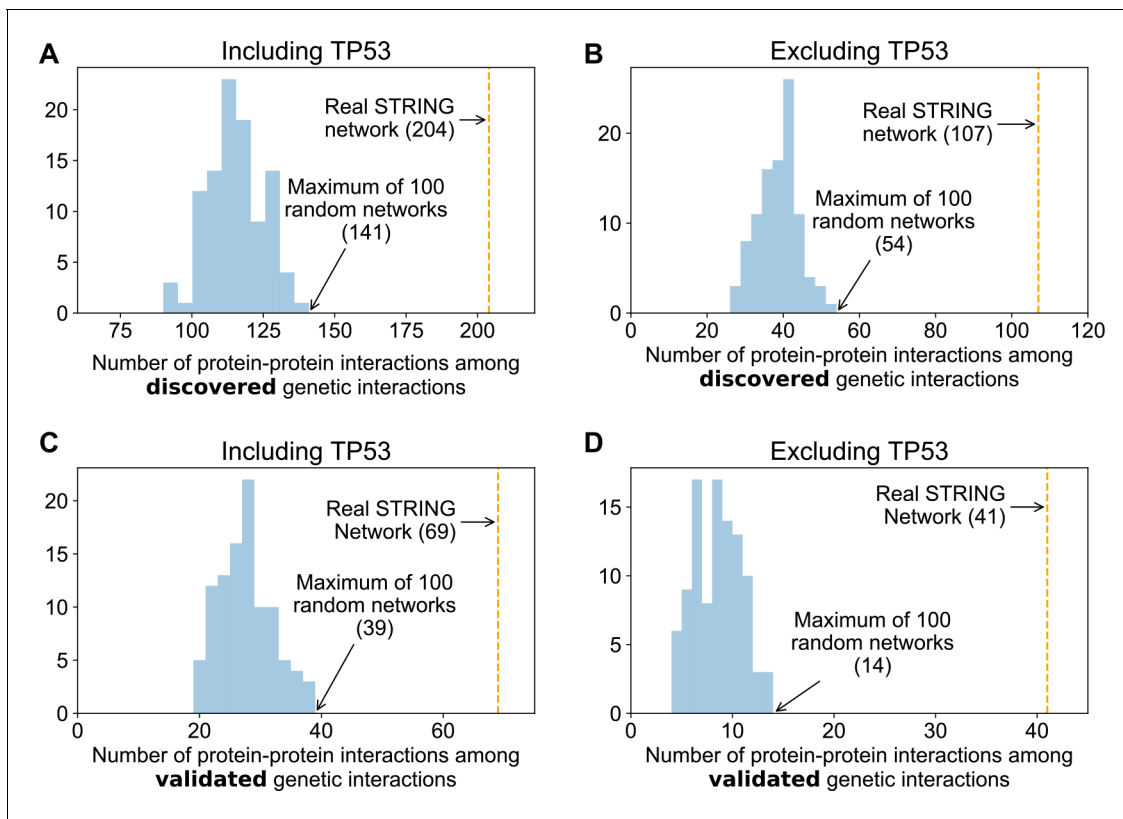

**Figure 5—figure supplement 2.** Genetic interactions are more enriched in real protein–protein interaction networks than randomised networks. Histograms showing the overlap between 100 degree matched randomisations of the STRING medium confidence protein–protein interaction and discovered (A and B) and validated (C and D) genetic interactions. The observed overlap with the real STRING protein interaction are highlighted with the orange lines.

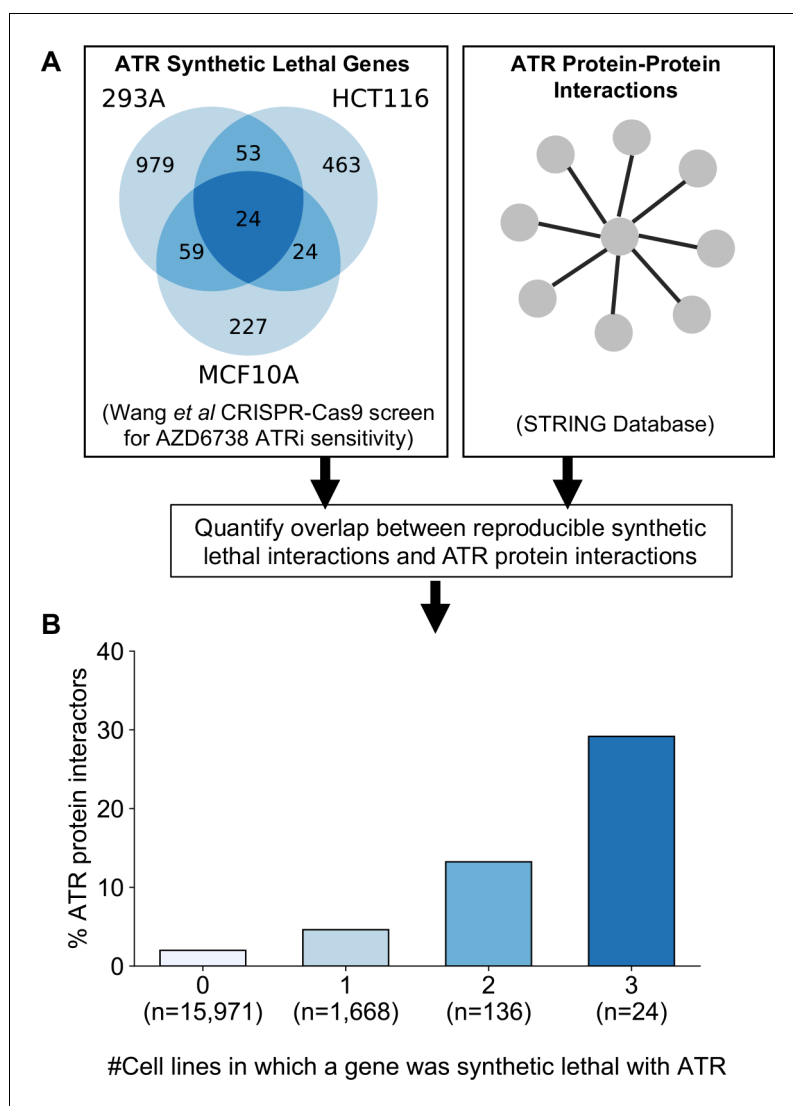

**Figure 6.** Reproducible ATR synthetic lethal interactions are enriched in ATR protein–protein interaction partners. (A) Workflow - synthetic lethal interactions from CRISPR-Cas9 screens in three cell lines (Wang *et al.*, 2019) were compared to identify reproducible synthetic lethal partners. These genes were then compared with known ATR protein–protein interaction partners from the STRING database. (B) Bar chart showing the percentage of ATR protein interaction partners observed in different groups of genes. Genes are grouped according to whether they were identified as an ATR synthetic lethal partner in 0, 1, 2, or 3 cell line screens. Comparisons between all pairs of groups are significant at  $p < 0.001$  (Fisher's exact test) except for the comparison between genes that were hits in 2 and 3 cell lines ( $p = 0.06$ ).

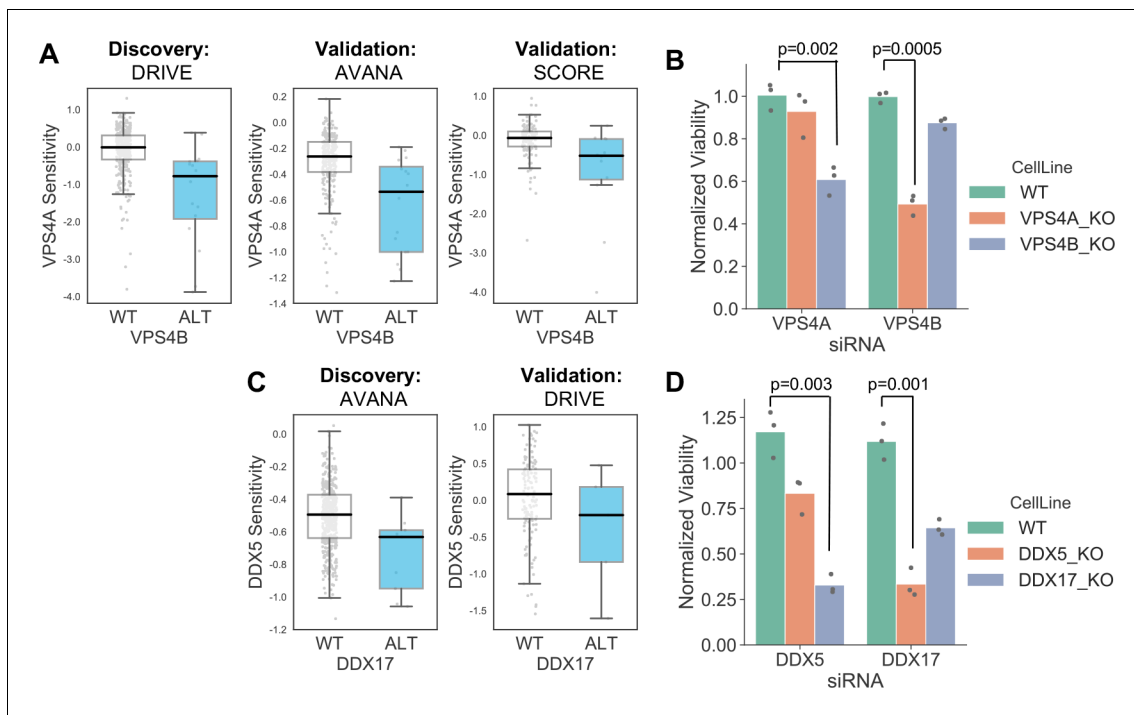

**Figure 7.** Robust synthetic lethalties associated with passenger gene loss. (A) Boxplots showing the association between *VPS4B* loss and *VPS4A* sensitivity in the discovery dataset (DRIVE) and two validation datasets (AVANA and SCORE). (B) Mean viability of HAP1 cells treated with siRNA smartpools targeting *VPS4A* or *VPS4B*. Individual data points are shown as black dots. Data are normalized within each cell line such that the mean viability of cells treated with a negative control (non-targeting scrambled siRNA) is equal to one and the mean viability treated with a positive control (siRNA smartpool targeting the broadly essential *PLK1* gene) is equal to 0. P-values from two-sided heteroscedastic T-tests. (C) Boxplots showing the association between *DDX17* loss and *DDX5* sensitivity in the discovery dataset (AVANA) and the validation dataset (DRIVE). (D) Mean viability of HAP1 cells treated with siRNA smartpools targeting *DDX5* or *DDX17*, normalization and statistics as per B.
