# Supplementary material for: Integrative analysis of large-scale loss-of-function screens identifies robust cancer-associated genetic interactions
Source: eLife journal article supplement (doi:10.7554/elife.58925), 2020-05-28
Supplement: supp [file elife-58925-supp-v1.zip]

Archive with 12 entries (12 files):
- elife_poa_e58925_Figure_2_figure_supplement_1.pdf
- elife_poa_e58925_Figure_3_figure_supplement_1.pdf
- elife_poa_e58925_Figure_5_figure_supplement_1.pdf
- elife_poa_e58925_Figure_5_figure_supplement_2.pdf
- elife_poa_e58925_Supplementary_file_1.csv
- elife_poa_e58925_Supplementary_file_2.txt
- elife_poa_e58925_Supplementary_file_3.xlsx
- elife_poa_e58925_Supplementary_file_4.xlsx
- elife_poa_e58925_Supplementary_file_5.xlsx
- elife_poa_e58925_Supplementary_file_6.csv
- elife_poa_e58925_Supplementary_file_7.csv
- elife_poa_e58925_Supplementary_file_8.xlsx
