# Supplementary material for: Integrative analysis of large-scale loss-of-function screens identifies robust cancer-associated genetic interactions
Source: eLife journal article supplement (doi:10.7554/elife.58925), 2020-05-28
Supplement: supp [file elife-58925-supp-v1.zip › elife_poa_e58925_Supplementary_file_4.xlsx]

## Sheet: Pathway Enrichment
Driver	Source	PathwayID	PathwayName	p_value	term_size	query_size	intersection_size	effective_domain_size	precision	recall	DriverDependenciesInPathway	DriverInPathway
BRAF	REAC	REAC:R-HSA-5674499	Negative feedback regulation of MAPK pathway	3.22198e-05	5	10	4	2501	0.4	0.8	['MAP2K1', 'MAPK1', 'RAF1', 'BRAF']	TRUE
BRAF	REAC	REAC:R-HSA-5684996	MAPK1/MAPK3 signaling	0.000155108	42	10	6	2501	0.6	0.142857	['PTPN11', 'PEA15', 'MAP2K1', 'MAPK1', 'RAF1', 'BRAF']	TRUE
BRAF	KEGG	KEGG:04650	Natural killer cell mediated cytotoxicity	0.000176217	19	10	5	2501	0.5	0.263158	['PTPN11', 'MAP2K1', 'MAPK1', 'RAF1', 'BRAF']	TRUE
BRAF	REAC	REAC:R-HSA-112409	RAF-independent MAPK1/3 activation	0.000448479	8	10	4	2501	0.4	0.5	['PTPN11', 'PEA15', 'MAP2K1', 'MAPK1']	TRUE
BRAF	REAC	REAC:R-HSA-9607240	FLT3 Signaling	0.000525872	51	10	6	2501	0.6	0.117647	['PTPN11', 'PEA15', 'MAP2K1', 'MAPK1', 'RAF1', 'BRAF']	TRUE
BRAF	REAC	REAC:R-HSA-5683057	MAPK family signaling cascades	0.000525872	51	10	6	2501	0.6	0.117647	['PTPN11', 'PEA15', 'MAP2K1', 'MAPK1', 'RAF1', 'BRAF']	TRUE
BRAF	KEGG	KEGG:05211	Renal cell carcinoma	0.00146704	28	10	5	2501	0.5	0.178571	['PTPN11', 'MAP2K1', 'MAPK1', 'RAF1', 'BRAF']	TRUE
BRAF	REAC	REAC:R-HSA-6802948	Signaling by high-kinase activity BRAF mutants	0.00210207	11	10	4	2501	0.4	0.363636	['MAP2K1', 'MAPK1', 'RAF1', 'BRAF']	TRUE
BRAF	REAC	REAC:R-HSA-5675221	Negative regulation of MAPK pathway	0.00210207	11	10	4	2501	0.4	0.363636	['MAP2K1', 'MAPK1', 'RAF1', 'BRAF']	TRUE
BRAF	REAC	REAC:R-HSA-5654733	Negative regulation of FGFR4 signaling	0.002304	3	10	3	2501	0.3	1	['PTPN11', 'MAPK1', 'BRAF']	TRUE
BRAF	REAC	REAC:R-HSA-5654732	Negative regulation of FGFR3 signaling	0.002304	3	10	3	2501	0.3	1	['PTPN11', 'MAPK1', 'BRAF']	TRUE
BRAF	REAC	REAC:R-HSA-5654727	Negative regulation of FGFR2 signaling	0.002304	3	10	3	2501	0.3	1	['PTPN11', 'MAPK1', 'BRAF']	TRUE
BRAF	REAC	REAC:R-HSA-5654726	Negative regulation of FGFR1 signaling	0.002304	3	10	3	2501	0.3	1	['PTPN11', 'MAPK1', 'BRAF']	TRUE
BRAF	REAC	REAC:R-HSA-1295596	Spry regulation of FGF signaling	0.002304	3	10	3	2501	0.3	1	['PTPN11', 'MAPK1', 'BRAF']	TRUE
BRAF	KEGG	KEGG:04730	Long-term depression	0.00314704	12	10	4	2501	0.4	0.333333	['MAP2K1', 'MAPK1', 'RAF1', 'BRAF']	TRUE
BRAF	KEGG	KEGG:04722	Neurotrophin signaling pathway	0.00411184	34	10	5	2501	0.5	0.147059	['PTPN11', 'MAP2K1', 'MAPK1', 'RAF1', 'BRAF']	TRUE
BRAF	KEGG	KEGG:05220	Chronic myeloid leukemia	0.00555213	36	10	5	2501	0.5	0.138889	['PTPN11', 'MAP2K1', 'MAPK1', 'RAF1', 'BRAF']	TRUE
BRAF	REAC	REAC:R-HSA-6802955	Paradoxical activation of RAF signaling by kinase inactive BRAF	0.00633952	14	10	4	2501	0.4	0.285714	['MAP2K1', 'MAPK1', 'RAF1', 'BRAF']	TRUE
BRAF	REAC	REAC:R-HSA-9649948	Signaling downstream of RAS mutants	0.00633952	14	10	4	2501	0.4	0.285714	['MAP2K1', 'MAPK1', 'RAF1', 'BRAF']	TRUE
BRAF	REAC	REAC:R-HSA-6802946	Signaling by moderate kinase activity BRAF mutants	0.00633952	14	10	4	2501	0.4	0.285714	['MAP2K1', 'MAPK1', 'RAF1', 'BRAF']	TRUE
BRAF	REAC	REAC:R-HSA-6802949	Signaling by RAS mutants	0.00633952	14	10	4	2501	0.4	0.285714	['MAP2K1', 'MAPK1', 'RAF1', 'BRAF']	TRUE
BRAF	REAC	REAC:R-HSA-5674135	MAP2K and MAPK activation	0.00633952	14	10	4	2501	0.4	0.285714	['MAP2K1', 'MAPK1', 'RAF1', 'BRAF']	TRUE
BRAF	REAC	REAC:R-HSA-6802952	Signaling by BRAF and RAF fusions	0.00862814	15	10	4	2501	0.4	0.266667	['MAP2K1', 'MAPK1', 'RAF1', 'BRAF']	TRUE
BRAF	KEGG	KEGG:04720	Long-term potentiation	0.00862814	15	10	4	2501	0.4	0.266667	['MAP2K1', 'MAPK1', 'RAF1', 'BRAF']	TRUE
BRAF	REAC	REAC:R-HSA-170968	Frs2-mediated activation	0.00919663	4	10	3	2501	0.3	0.75	['MAP2K1', 'MAPK1', 'BRAF']	TRUE
BRAF	REAC	REAC:R-HSA-5673001	RAF/MAP kinase cascade	0.010944	41	10	5	2501	0.5	0.121951	['PEA15', 'MAP2K1', 'MAPK1', 'RAF1', 'BRAF']	TRUE
BRAF	KEGG	KEGG:04726	Serotonergic synapse	0.011482	16	10	4	2501	0.4	0.25	['MAP2K1', 'MAPK1', 'RAF1', 'BRAF']	TRUE
BRAF	KEGG	KEGG:04270	Vascular smooth muscle contraction	0.014986	17	10	4	2501	0.4	0.235294	['MAP2K1', 'MAPK1', 'RAF1', 'BRAF']	TRUE
BRAF	KEGG	KEGG:04014	Ras signaling pathway	0.0177221	45	10	5	2501	0.5	0.111111	['PTPN11', 'SHOC2', 'MAP2K1', 'MAPK1', 'RAF1']	TRUE
BRAF	REAC	REAC:R-HSA-6802957	Oncogenic MAPK signaling	0.0192305	18	10	4	2501	0.4	0.222222	['MAP2K1', 'MAPK1', 'RAF1', 'BRAF']	TRUE
BRAF	KEGG	KEGG:05219	Bladder cancer	0.0192305	18	10	4	2501	0.4	0.222222	['MAP2K1', 'MAPK1', 'RAF1', 'BRAF']	TRUE
BRAF	KEGG	KEGG:05205	Proteoglycans in cancer	0.0221752	47	10	5	2501	0.5	0.106383	['PTPN11', 'MAP2K1', 'MAPK1', 'RAF1', 'BRAF']	TRUE
BRAF	REAC	REAC:R-HSA-169893	Prolonged ERK activation events	0.04579	6	10	3	2501	0.3	0.5	['MAP2K1', 'MAPK1', 'BRAF']	TRUE
CDKN2A	KEGG	KEGG:04110	Cell cycle	3.86453e-08	31	9	7	2501	0.777778	0.225806	['CDK6', 'CCNE1', 'E2F1', 'E2F3', 'CDKN2A', 'SKP2', 'CDK2']	TRUE
CDKN2A	REAC	REAC:R-HSA-453279	Mitotic G1 phase and G1/S transition	2.24767e-07	39	9	7	2501	0.777778	0.179487	['CDK6', 'CCNE1', 'E2F1', 'E2F3', 'CDKN2A', 'SKP2', 'CDK2']	TRUE
CDKN2A	REAC	REAC:R-HSA-69236	G1 Phase	6.08625e-06	12	9	5	2501	0.555556	0.416667	['CDK6', 'E2F1', 'E2F3', 'CDKN2A', 'SKP2']	TRUE
CDKN2A	REAC	REAC:R-HSA-69231	Cyclin D associated events in G1	6.08625e-06	12	9	5	2501	0.555556	0.416667	['CDK6', 'E2F1', 'E2F3', 'CDKN2A', 'SKP2']	TRUE
CDKN2A	KEGG	KEGG:05222	Small cell lung cancer	1.09657e-05	32	9	6	2501	0.666667	0.1875	['CDK6', 'CCNE1', 'E2F1', 'E2F3', 'SKP2', 'CDK2']	TRUE
CDKN2A	KEGG	KEGG:04934	Cushing syndrome	1.33885e-05	33	9	6	2501	0.666667	0.181818	['CDK6', 'CCNE1', 'E2F1', 'E2F3', 'CDKN2A', 'CDK2']	TRUE
CDKN2A	KEGG	KEGG:05169	Epstein-Barr virus infection	8.43588e-05	44	9	6	2501	0.666667	0.136364	['CDK6', 'CCNE1', 'E2F1', 'E2F3', 'SKP2', 'CDK2']	TRUE
CDKN2A	KEGG	KEGG:04218	Cellular senescence	0.000166242	49	9	6	2501	0.666667	0.122449	['CDK6', 'CCNE1', 'E2F1', 'E2F3', 'CDKN2A', 'CDK2']	TRUE
CDKN2A	REAC	REAC:R-HSA-69306	DNA Replication	0.000401226	25	9	5	2501	0.555556	0.2	['CCNE1', 'E2F1', 'E2F3', 'SKP2', 'CDK2']	TRUE
CDKN2A	KEGG	KEGG:05200	Pathways in cancer	0.000727871	118	9	7	2501	0.777778	0.059322	['CDK6', 'CCNE1', 'E2F1', 'E2F3', 'CDKN2A', 'SKP2', 'CDK2']	TRUE
CDKN2A	REAC	REAC:R-HSA-2559583	Cellular Senescence	0.000965613	65	9	6	2501	0.666667	0.0923077	['CDK6', 'CCNE1', 'E2F1', 'E2F3', 'CDKN2A', 'CDK2']	TRUE
CDKN2A	REAC	REAC:R-HSA-68911	G2 Phase	0.0016128	3	9	3	2501	0.333333	1	['E2F1', 'E2F3', 'CDK2']	TRUE
CDKN2A	REAC	REAC:R-HSA-2559585	Oncogene Induced Senescence	0.00273006	13	9	4	2501	0.444444	0.307692	['CDK6', 'E2F1', 'E2F3', 'CDKN2A']	TRUE
CDKN2A	REAC	REAC:R-HSA-69278	Cell Cycle, Mitotic	0.00297563	144	9	7	2501	0.777778	0.0486111	['CDK6', 'CCNE1', 'E2F1', 'E2F3', 'CDKN2A', 'SKP2', 'CDK2']	TRUE
CDKN2A	REAC	REAC:R-HSA-1640170	Cell Cycle	0.00954532	170	9	7	2501	0.777778	0.0411765	['CDK6', 'CCNE1', 'E2F1', 'E2F3', 'CDKN2A', 'SKP2', 'CDK2']	TRUE
CDKN2A	KEGG	KEGG:04115	p53 signaling pathway	0.0115903	18	9	4	2501	0.444444	0.222222	['CDK6', 'CCNE1', 'CDKN2A', 'CDK2']	TRUE
CDKN2A	REAC	REAC:R-HSA-69202	Cyclin E associated events during G1/S transition	0.0146575	19	9	4	2501	0.444444	0.210526	['CCNE1', 'E2F1', 'SKP2', 'CDK2']	TRUE
CDKN2A	REAC	REAC:R-HSA-6804116	TP53 Regulates Transcription of Genes Involved in G1 Cell Cycle Arrest	0.0160699	5	9	3	2501	0.333333	0.6	['CCNE1', 'E2F1', 'CDK2']	TRUE
CDKN2A	KEGG	KEGG:05166	Human T-cell leukemia virus 1 infection	0.0208673	53	9	5	2501	0.555556	0.0943396	['CCNE1', 'E2F1', 'E2F3', 'CDKN2A', 'CDK2']	TRUE
CDKN2A	REAC	REAC:R-HSA-69656	Cyclin A:Cdk2-associated events at S phase entry	0.0225601	21	9	4	2501	0.444444	0.190476	['CCNE1', 'E2F1', 'SKP2', 'CDK2']	TRUE
CDKN2A	KEGG	KEGG:05206	MicroRNAs in cancer	0.0276634	56	9	5	2501	0.555556	0.0892857	['CDK6', 'CCNE1', 'E2F1', 'E2F3', 'CDKN2A']	TRUE
CDKN2A	KEGG	KEGG:05203	Viral carcinogenesis	0.0302823	57	9	5	2501	0.555556	0.0877193	['CDK6', 'CCNE1', 'CDKN2A', 'SKP2', 'CDK2']	TRUE
NRAS	KEGG	KEGG:04014	Ras signaling pathway	0.0226031	45	5	4	2501	0.8	0.0888889	['PTPN11', 'SHOC2', 'NRAS', 'RAF1']	TRUE
PTEN	REAC	REAC:R-HSA-9027276	Erythropoietin activates Phosphoinositide-3-kinase (PI3K)	0.00383309	5	6	3	2501	0.5	0.6	['IRS2', 'PIK3CA', 'PIK3CB']	TRUE
PTEN	REAC	REAC:R-HSA-198203	PI3K/AKT activation	0.00383309	5	6	3	2501	0.5	0.6	['IRS2', 'PIK3CA', 'PIK3CB']	TRUE
PTEN	REAC	REAC:R-HSA-8853659	RET signaling	0.0214073	8	6	3	2501	0.5	0.375	['IRS2', 'PIK3CA', 'PIK3CB']	TRUE
PTEN	KEGG	KEGG:04923	Regulation of lipolysis in adipocytes	0.04579	10	6	3	2501	0.5	0.3	['IRS2', 'PIK3CA', 'PIK3CB']	FALSE
PTEN	REAC	REAC:R-HSA-9006335	Signaling by Erythropoietin	0.04579	10	6	3	2501	0.5	0.3	['IRS2', 'PIK3CA', 'PIK3CB']	FALSE
RB1	REAC	REAC:R-HSA-69236	G1 Phase	1.11477e-09	12	14	7	2501	0.5	0.583333	['CDK6', 'E2F1', 'TFDP1', 'E2F3', 'CKS1B', 'SKP2', 'CDK4']	TRUE
RB1	REAC	REAC:R-HSA-69231	Cyclin D associated events in G1	1.11477e-09	12	14	7	2501	0.5	0.583333	['CDK6', 'E2F1', 'TFDP1', 'E2F3', 'CKS1B', 'SKP2', 'CDK4']	TRUE
RB1	REAC	REAC:R-HSA-453279	Mitotic G1 phase and G1/S transition	1.93164e-09	39	14	9	2501	0.642857	0.230769	['CDK6', 'E2F1', 'CCNE1', 'TFDP1', 'E2F3', 'CKS1B', 'SKP2', 'CDK4', 'CDK2']	TRUE
RB1	KEGG	KEGG:04110	Cell cycle	3.00289e-08	31	14	8	2501	0.571429	0.258065	['CDK6', 'E2F1', 'CCNE1', 'TFDP1', 'E2F3', 'SKP2', 'CDK4', 'CDK2']	TRUE
RB1	KEGG	KEGG:05222	Small cell lung cancer	3.99522e-08	32	14	8	2501	0.571429	0.25	['CDK6', 'E2F1', 'CCNE1', 'E2F3', 'CKS1B', 'SKP2', 'CDK4', 'CDK2']	TRUE
RB1	REAC	REAC:R-HSA-69202	Cyclin E associated events during G1/S transition	6.97095e-08	19	14	7	2501	0.5	0.368421	['E2F1', 'CCNE1', 'TFDP1', 'CKS1B', 'SKP2', 'CDK4', 'CDK2']	TRUE
RB1	REAC	REAC:R-HSA-69656	Cyclin A:Cdk2-associated events at S phase entry	1.60076e-07	21	14	7	2501	0.5	0.333333	['E2F1', 'CCNE1', 'TFDP1', 'CKS1B', 'SKP2', 'CDK4', 'CDK2']	TRUE
RB1	REAC	REAC:R-HSA-69206	G1/S Transition	3.53154e-06	31	14	7	2501	0.5	0.225806	['E2F1', 'CCNE1', 'TFDP1', 'CKS1B', 'SKP2', 'CDK4', 'CDK2']	TRUE
RB1	REAC	REAC:R-HSA-69242	S Phase	7.17134e-06	34	14	7	2501	0.5	0.205882	['E2F1', 'CCNE1', 'TFDP1', 'CKS1B', 'SKP2', 'CDK4', 'CDK2']	TRUE
RB1	KEGG	KEGG:05169	Epstein-Barr virus infection	4.98304e-05	44	14	7	2501	0.5	0.159091	['CDK6', 'E2F1', 'CCNE1', 'E2F3', 'SKP2', 'CDK4', 'CDK2']	TRUE
RB1	REAC	REAC:R-HSA-187577	SCF(Skp2)-mediated degradation of p27/p21	5.59216e-05	11	14	5	2501	0.357143	0.454545	['CCNE1', 'CKS1B', 'SKP2', 'CDK4', 'CDK2']	TRUE
RB1	REAC	REAC:R-HSA-2559585	Oncogene Induced Senescence	0.000154845	13	14	5	2501	0.357143	0.384615	['CDK6', 'E2F1', 'TFDP1', 'E2F3', 'CDK4']	TRUE
RB1	REAC	REAC:R-HSA-69278	Cell Cycle, Mitotic	0.000426238	144	14	9	2501	0.642857	0.0625	['CDK6', 'E2F1', 'CCNE1', 'TFDP1', 'E2F3', 'CKS1B', 'SKP2', 'CDK4', 'CDK2']	TRUE
RB1	KEGG	KEGG:04934	Cushing syndrome	0.000456833	33	14	6	2501	0.428571	0.181818	['CDK6', 'E2F1', 'CCNE1', 'E2F3', 'CDK4', 'CDK2']	TRUE
RB1	REAC	REAC:R-HSA-2559583	Cellular Senescence	0.000859064	65	14	7	2501	0.5	0.107692	['CDK6', 'E2F1', 'CCNE1', 'TFDP1', 'E2F3', 'CDK4', 'CDK2']	TRUE
RB1	REAC	REAC:R-HSA-1640170	Cell Cycle	0.00188	170	14	9	2501	0.642857	0.0529412	['CDK6', 'E2F1', 'CCNE1', 'TFDP1', 'E2F3', 'CKS1B', 'SKP2', 'CDK4', 'CDK2']	TRUE
RB1	KEGG	KEGG:05200	Pathways in cancer	0.00230151	118	14	8	2501	0.571429	0.0677966	['CDK6', 'E2F1', 'CCNE1', 'E2F3', 'CKS1B', 'SKP2', 'CDK4', 'CDK2']	TRUE
RB1	KEGG	KEGG:04218	Cellular senescence	0.00551689	49	14	6	2501	0.428571	0.122449	['CDK6', 'E2F1', 'CCNE1', 'E2F3', 'CDK4', 'CDK2']	TRUE
RB1	REAC	REAC:R-HSA-69306	DNA Replication	0.00616484	25	14	5	2501	0.357143	0.2	['E2F1', 'CCNE1', 'E2F3', 'SKP2', 'CDK2']	TRUE
RB1	REAC	REAC:R-HSA-68911	G2 Phase	0.0069888	3	14	3	2501	0.214286	1	['E2F1', 'E2F3', 'CDK2']	TRUE
RB1	REAC	REAC:R-HSA-8849470	PTK6 Regulates Cell Cycle	0.0069888	3	14	3	2501	0.214286	1	['CCNE1', 'CDK4', 'CDK2']	TRUE
RB1	REAC	REAC:R-HSA-1538133	G0 and Early G1	0.00993014	11	14	4	2501	0.285714	0.363636	['E2F1', 'CCNE1', 'TFDP1', 'CDK2']	TRUE
RB1	REAC	REAC:R-HSA-6791312	TP53 Regulates Transcription of Cell Cycle Genes	0.0148474	12	14	4	2501	0.285714	0.333333	['E2F1', 'CCNE1', 'TFDP1', 'CDK2']	TRUE
