# Supplementary figures and images for: Integrative analysis of large-scale loss-of-function screens identifies robust cancer-associated genetic interactions
Source: eLife journal article supplement (doi:10.7554/elife.58925), 2020-05-28

A

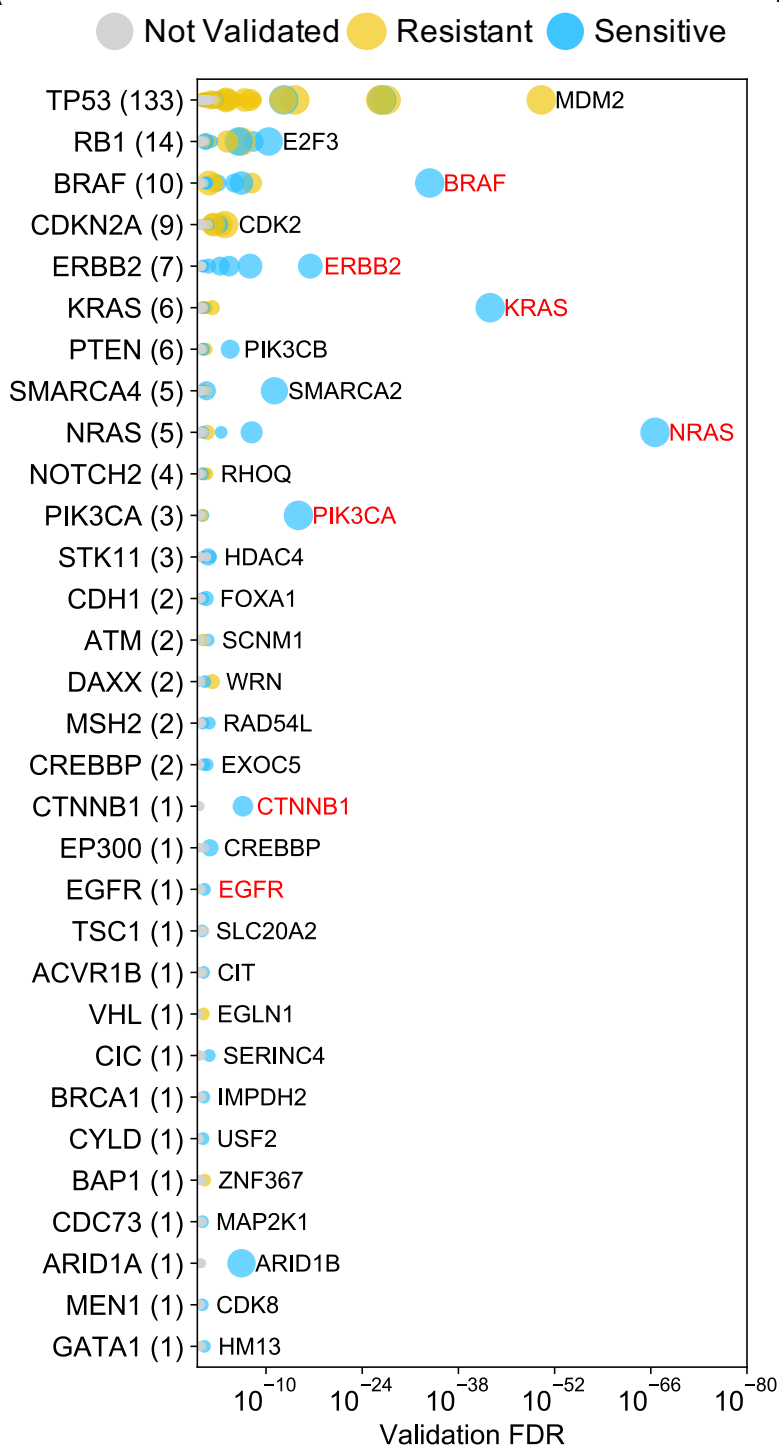

B

## Oncogene Additions

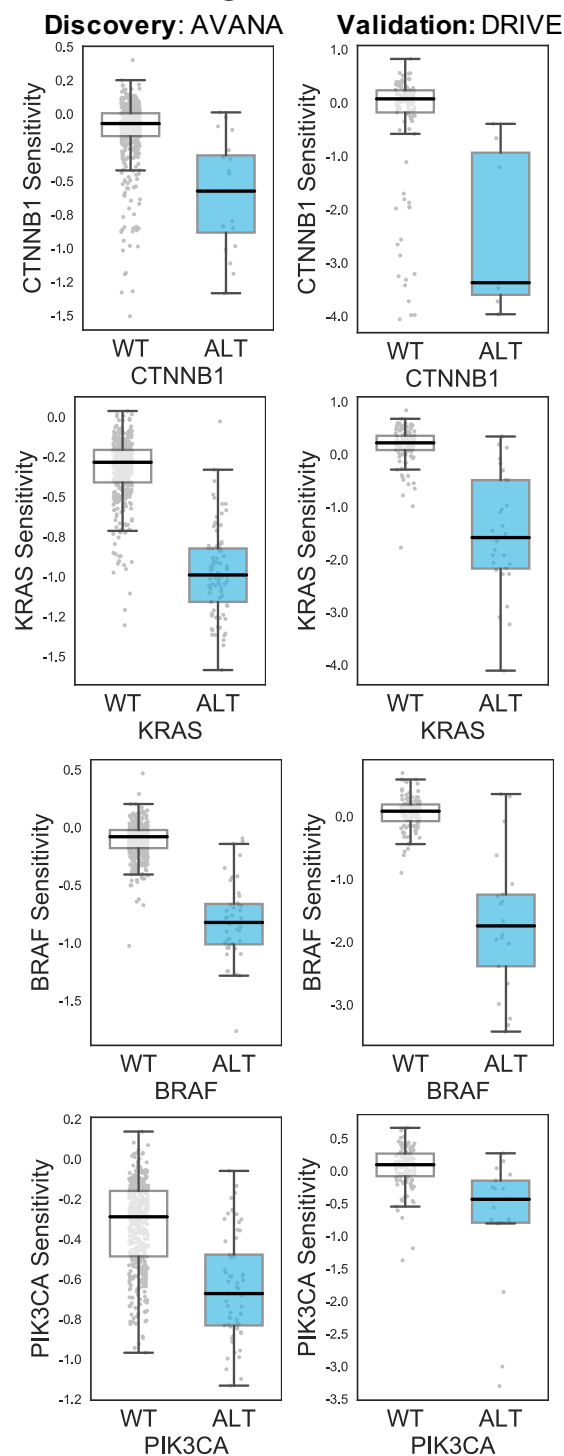

C

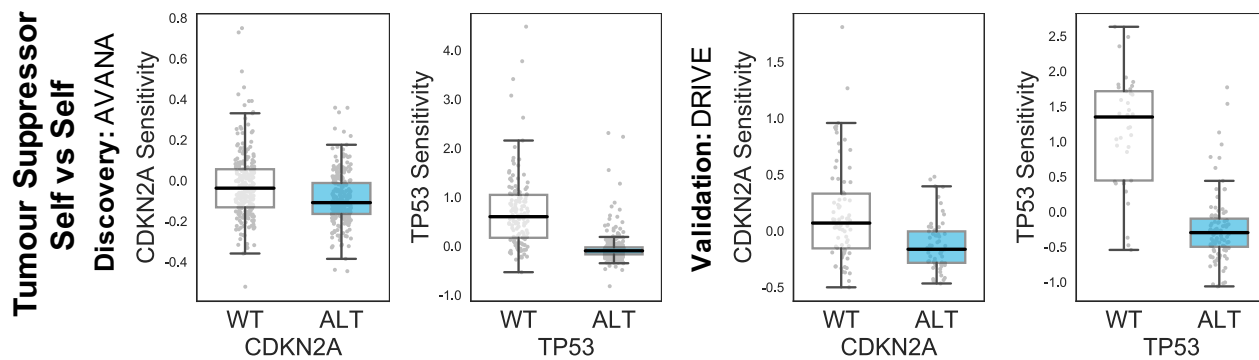

Supplement: supp [file elife-58925-supp-v1.zip]

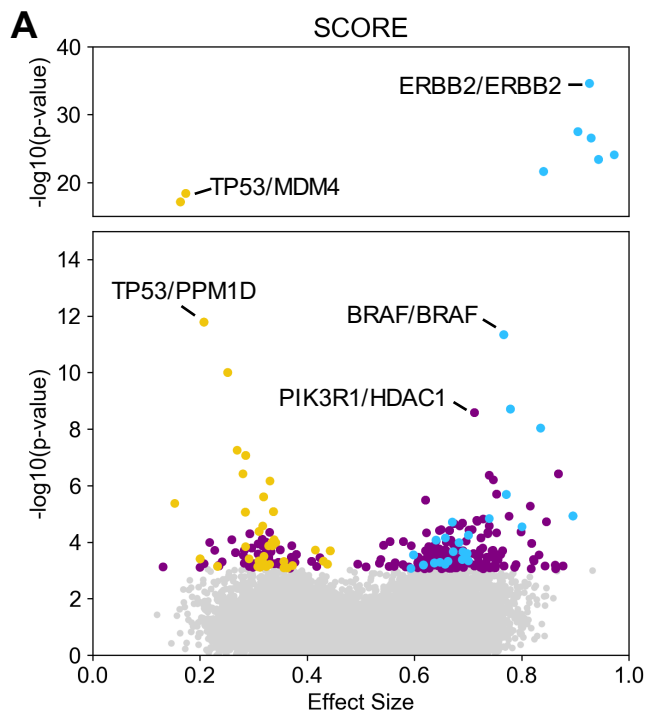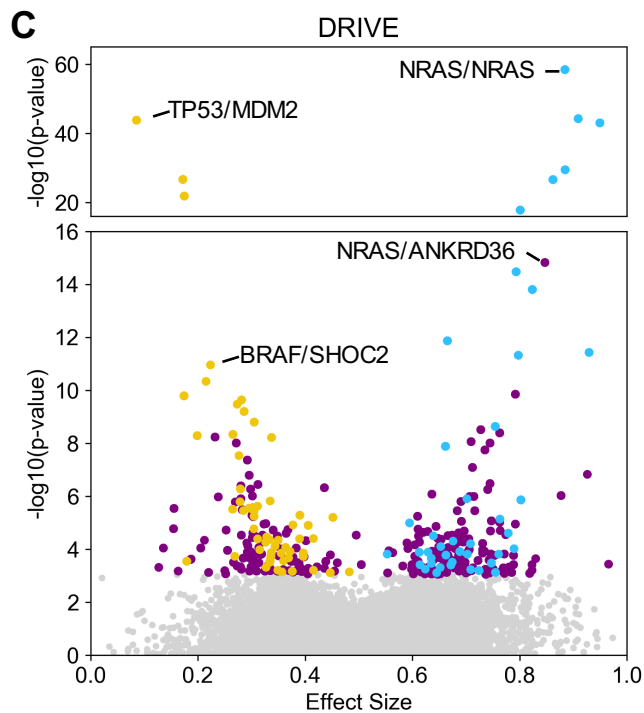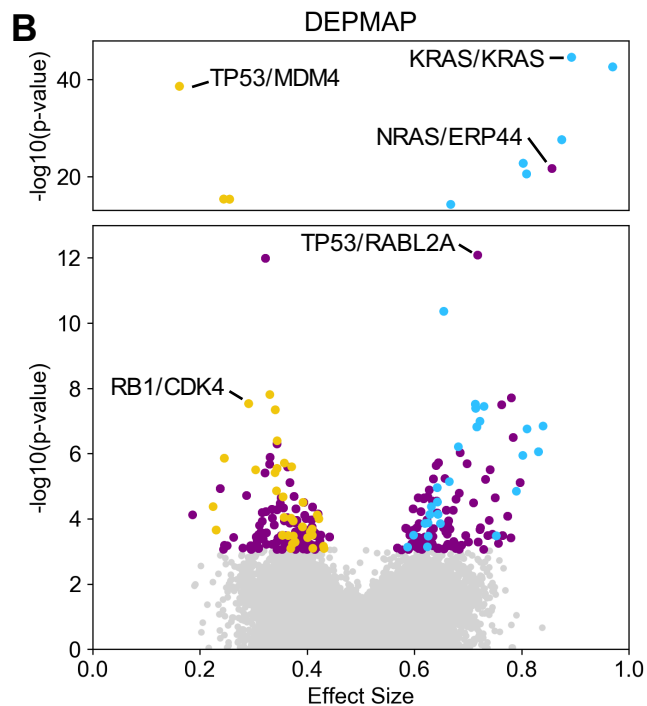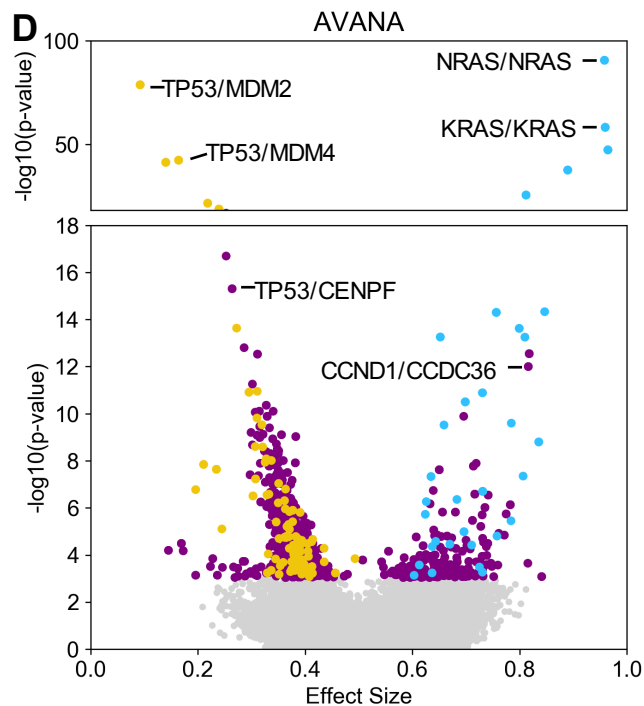

Supplement: supp [file elife-58925-supp-v1.zip]

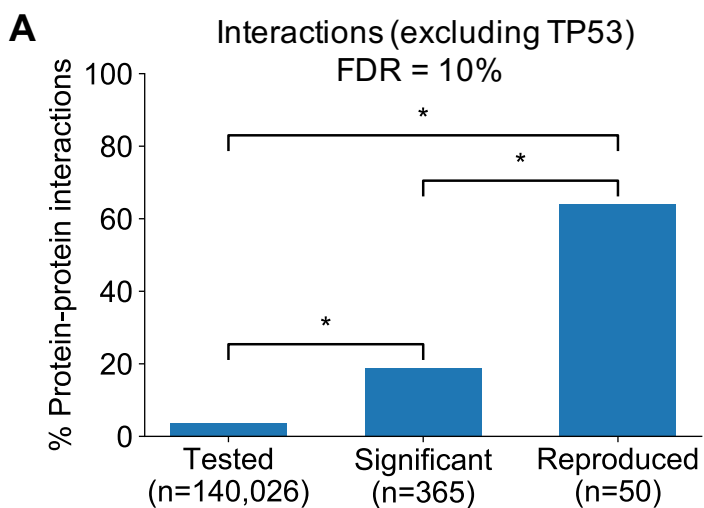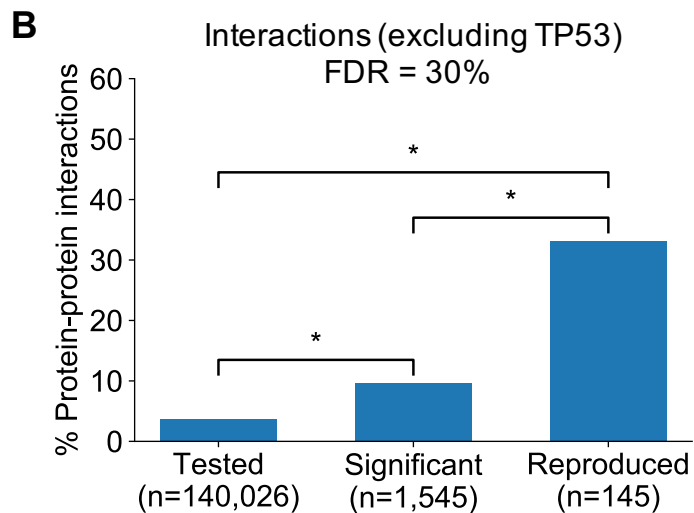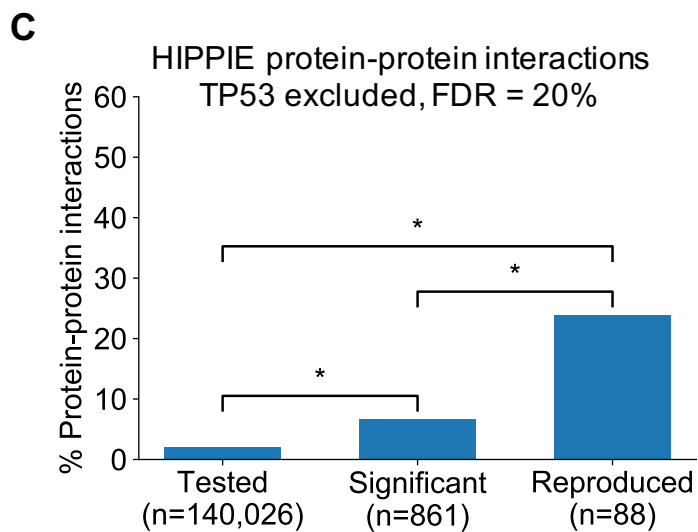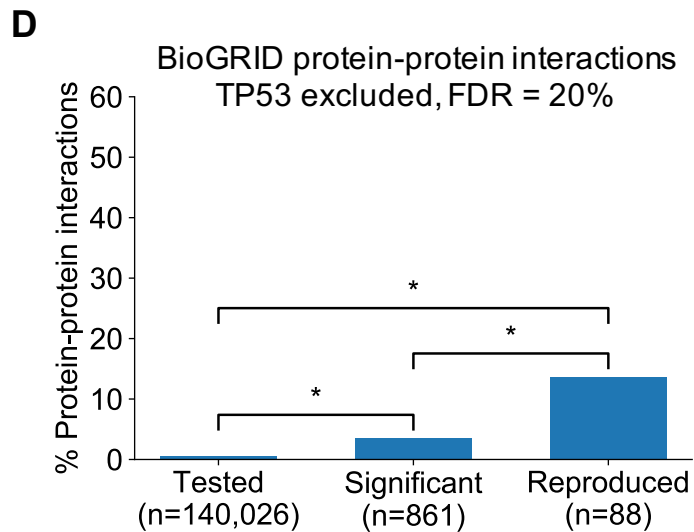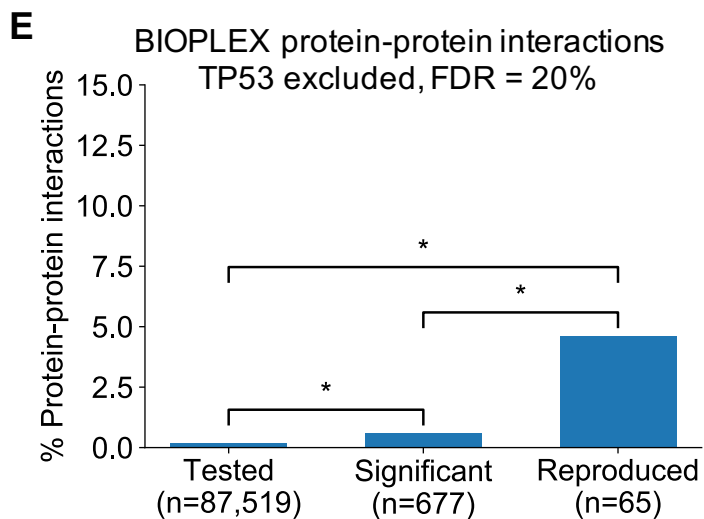

Supplement: supp [file elife-58925-supp-v1.zip]

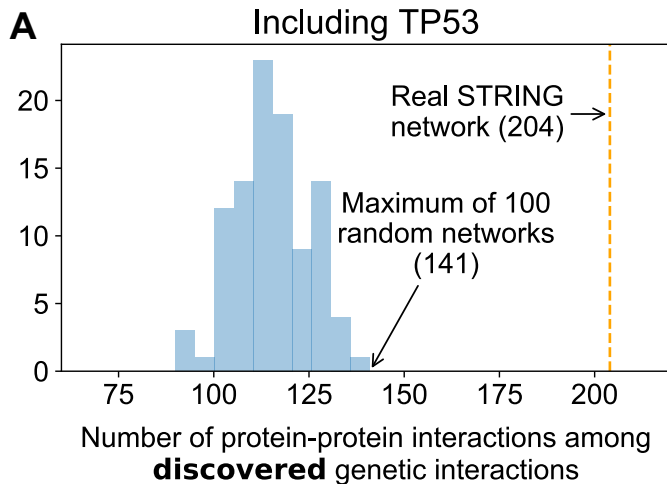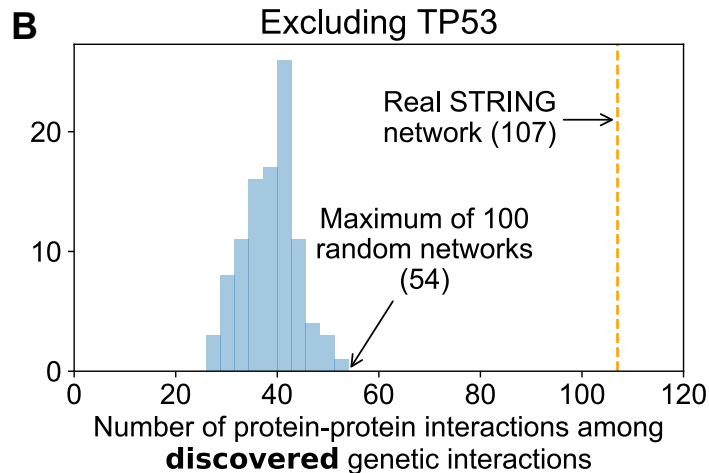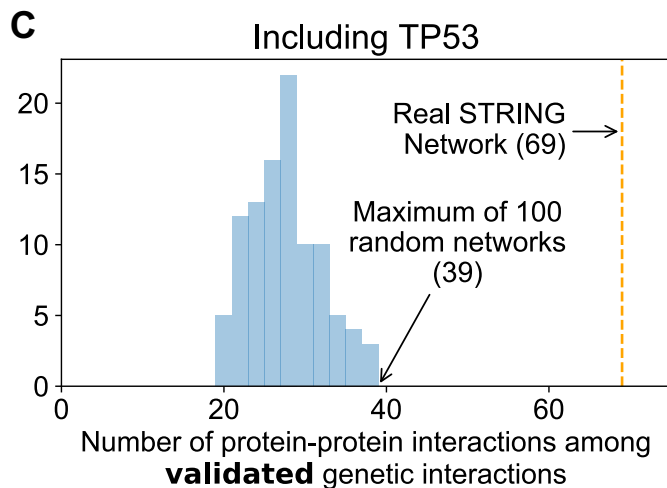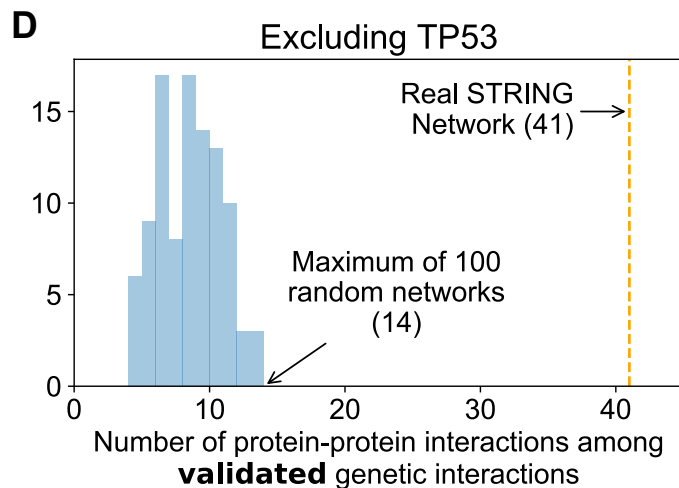

Supplement: supp [file elife-58925-supp-v1.zip › elife_poa_e58925_Figure_5_figure_supplement_2.pdf]
